# Supplementary material
Source: MDPI journal article supplement (https://www.mdpi.com/2297-8747/27/1/14)
Supplement: s1 [file s1]

## Supplementary Material : Mathematica Code for Figure 2 Results

### Version 12.3

### Paper : Arbitrarily Accurate Analytical Approximations for the Error Function

```
In[44]:= ClearAll["Global`*"];

(* Define Parameters *)

orderMin = 0;    orderMax = 10;

xMin = 0;    xMax = 4;    yMax = 1;    yMin = 10-6;
nPoint = 1000;    resolution =  $\frac{xMax - xMin}{nPoint}$ ;

aRatio = 6/11;    iSize = {310, 170};
font1 = {"Courier", FontSize → 9, FontWeight → "Bold"};
pStyleS = {RGBColor[1/4, 0, 0], PointSize[0.005], Thickness[0.004]};
pStyleT = {GrayLevel[0.], PointSize[0.005], Thickness[0.004]};

(* Define Integrand *)

f[x_] :=  $\frac{2}{\sqrt{\pi}} \text{Exp}[-x^2]$ ;    df[x_, i_] := D[f[tx], {tx, i}] /. tx → x;

Plot[f[x], {x, xMin, xMax}, PlotRange → {{xMin, xMax}, All},
  Frame → True, GridLines → Automatic, FrameTicks → Automatic, AspectRatio → aRatio,
  ImageSize → iSize, PlotStyle → pStyleS, BaseStyle → font1, PlotLabel → "Integrand"]

(* Define Spline Approx: Two Forms *)

p[x_, 0] = 1;
p[x_, k_] := p[x, k] = Expand[(D[p[tx, k - 1], {tx, 1}] /. tx → x) - 2*x*p[x, k - 1]]

Print[" "]
Do[
  Print["order = ", i, " Definition for p[x,i] = ", p[x, i] ],
  {i, 0, 6, 1}]
Print[" "]

erfApprox[n_, x1_, x2_] :=

$$\sum_{k=0}^n \left( \frac{\text{Factorial}[n]}{\text{Factorial}[n - k] * \text{Factorial}[k + 1]} * \frac{\text{Factorial}[2 * n + 1 - k]}{2 * \text{Factorial}[2 * n + 1]} * (x2 - x1)^{k+1} * (df[x1, k] + (-1)^k * df[x2, k]) \right)$$


erfApproxAlt[n_, x1_, x2_] :=  $\frac{2}{\sqrt{\pi}} * \sum_{k=0}^n \left( \frac{\text{Factorial}[n]}{\text{Factorial}[n - k] * \text{Factorial}[k + 1]} * \frac{\text{Factorial}[2 * n + 1 - k]}{2 * \text{Factorial}[2 * n + 1]} * (x2 - x1)^{k+1} * (p[x1, k] * \text{Exp}[-x1^2] + (-1)^k * p[x2, k] * \text{Exp}[-x2^2]) \right)$ 

re[order_, x_] := 1 -  $\frac{\text{erfApprox}[order, 0, x]}{\text{Erf}[x]}$ 

(* Explicit Spline Approx. Check on Approx. *)

fE[0, x_] :=  $\frac{x}{\sqrt{\pi}} + \frac{e^{-x^2} x}{\sqrt{\pi}}$ 

fE[1, x_] :=  $\frac{x}{\sqrt{\pi}} + \frac{x}{\sqrt{\pi}} * \left( 1 + \frac{x^2}{3} \right) * e^{-x^2}$ 

fE[2, x_] :=  $\frac{x}{\sqrt{\pi}} * \left( 1 - \frac{x^2}{30} \right) + \frac{x}{\sqrt{\pi}} * \left( 1 + \frac{11 * x^2}{30} + \frac{x^4}{15} \right) * e^{-x^2}$ 
```

```

fE[3, x_] :=  $\frac{x}{\sqrt{\pi}} * \left(1 - \frac{x^2}{21}\right) + \frac{x}{\sqrt{\pi}} * \left(1 + \frac{8 * x^2}{21} + \frac{17 * x^4}{210} + \frac{x^6}{105}\right) * e^{-x^2}$ 

fE[4, x_] :=  $\frac{x}{\sqrt{\pi}} * \left(1 - \frac{x^2}{18} + \frac{x^4}{1260}\right) + \frac{x}{\sqrt{\pi}} * \left(1 + \frac{7 * x^2}{18} + \frac{37 * x^4}{420} + \frac{4 * x^6}{315} + \frac{x^8}{945}\right) * e^{-x^2}$ 

fE[5, x_] :=  $\frac{x}{\sqrt{\pi}} * \left(1 - \frac{2 * x^2}{33} + \frac{x^4}{660}\right) + \frac{x}{\sqrt{\pi}} * \left(1 + \frac{13 * x^2}{33} + \frac{61 * x^4}{660} + \frac{67 * x^6}{4620} + \frac{16 * x^8}{10395} + \frac{x^{10}}{10395}\right) * e^{-x^2}$ 

Print[" "]
Do[
  Print["order = ", i, "    Check on Spline Approx:    ",
    Simplify[erfApprox[i, 0, x] - fE[i, x] ], "    ", Simplify[erfApproxAlt[i, 0, x] - fE[i, x] ]],
  {i, 0, 5, 1}]
Print[" "]

(* RE for Spline Approx. *)

Do[
  data = Table[Abs[N[re[order, xMin + i * resolution]]], {i, 1, nPoint, 1}];
  dataG = Table[{xMin + i * resolution, Abs[N[re[order, xMin + i * resolution]]}], {i, 1, nPoint, 1}];
  maxRE[order] = Max[data];

  Print[pRE[order] =
    ListLogPlot[dataG, PlotRange -> {{xMin, xMax}, {yMin, yMax}}, Joined -> True, Frame -> True, GridLines -> Automatic,
      FrameTicks -> Automatic, AspectRatio -> aRatio, ImageSize -> iSize, PlotStyle -> pStyleS, BaseStyle -> font1,
      PlotLabel -> {"RE: Erf Approx: Order = ", order, " Max RE = ", NumberForm[maxRE[order], 5]}] ],

  {order, orderMin, orderMax, 1}];

tables = Table[pRE[order], {order, orderMin, orderMax, 1}];
eS = Show[tables, PlotLabel -> " "]

(* Table of RE bounds for [0,4] *)

dataRE = Table[{order, NumberForm[maxRE[order], 5]}, {order, orderMin, orderMax, 1}];
dataRE = Prepend[dataRE, {SplineOrder, MaxRE}];
Print[StyleForm[TableForm[dataRE], FontSize -> 10]];

(* Taylor Series *)

orderMinT = 1;    orderMaxT = 15;

resolutionT =  $\frac{xMax - xMin}{100}$ ;

taylorSeries[order_, x_] :=  $\frac{2}{\sqrt{\pi}} * \sum_{k=1}^{order} \left( \frac{1 + (-1)^{k+1}}{2} \right) * \frac{(-1)^{(k-1)/2} x^k}{k * \text{Factorial}\left[\frac{k-1}{2}\right]}$ 

reT[order_, x_] :=  $1 - \frac{\text{taylorSeries[order, x]}}{\text{Erf}[x]}$ 

Print[" "]
Do[
  Print["Taylor series: order = ", i, "    ", Expand[taylorSeries[i, x] ]],
  {i, 1, 9, 2}];

Print[" "];
Do[
  tableRET = Table[{i * resolutionT, Abs[N[reT[orderT, i * resolutionT]]}], {i, 1, nPoint, 1}];

  pRET[orderT] = ListLogPlot[tableRET, PlotRange -> {{xMin, xMax}, {yMin, yMax}}, Joined -> False,
    Frame -> True, GridLines -> Automatic, FrameTicks -> Automatic, AspectRatio -> aRatio, ImageSize -> iSize,
    PlotStyle -> pStyleT, BaseStyle -> font1, PlotLabel -> {"RE in Erf Approx. Order = ", order}],
  {orderT, orderMinT, orderMaxT, 2}]

```

```
tableT = Table[pRET[orderT], {orderT, orderMinT, orderMaxT, 2}];  
eT = Show[tableT, PlotLabel → "Taylor Series Approx.  "]
```

```
(* Combined Graph: Taylor Series + Spline Approx *)
```

```
e1 = Show[eS, eT, PlotLabel → "  "]
```
